# Supplementary material for: Structural design of asymmetric gradient alternating multilayered CNF/MXene/FeCo@rGO composite film for efficient and enhanced absorbing electromagnetic interference shielding
Source: Royal Society of Chemistry journal article supplement (doi:10.1039/d3ta06467k), 2023-12-06
Supplement: d3ta06467k1.pdf [file d3ta06467k1.pdf]

## Supplementary Information

### Structural design of asymmetric gradient alternating multilayered CNF/MXene/FeCo@rGO composite films for efficient and enhanced absorbing electromagnetic interference shielding

Meng Ma<sup>a,b\*</sup>, Wenqin Shao<sup>a</sup>, Qindan Chu<sup>a</sup>, Wenting Tao<sup>a</sup>, Si Chen<sup>a</sup>, Yanqin Shi<sup>a</sup>, Huiwen He<sup>a</sup>,  
Yulu Zhu<sup>a</sup>, Xu Wang<sup>a\*</sup>

<sup>a</sup> College of Materials Science and Engineering, Zhejiang Key Laboratory of Plastic Modification and Processing Technology, Zhejiang University of Technology, Hangzhou 310014, PR China.

<sup>b</sup> State Key Laboratory of Polymer Materials Engineering, Sichuan University, Chengdu, 610065, PR China.

\*Corresponding authors.

E-mail addresses: wangxu@zjut.edu.cn (X. Wang); mameng@zjut.edu.cn (M. Ma).

**Table S1** Composition and content of each layer of CNF/MXene/FeCo@rGO composite films

| Sample                              | Layer 1                                         | Layer 2                       | Layer 3                    | Layer 4                       | Layer 5                   | Layer 6           |
|-------------------------------------|-------------------------------------------------|-------------------------------|----------------------------|-------------------------------|---------------------------|-------------------|
| 20 wt%-1L                           | 18 mL CNF<br>9 mL<br>MXene<br>18 mL<br>FeCo@rGO |                               |                            |                               |                           |                   |
| 20 wt%-2L                           | 9 mL CNF<br>9 mL<br>MXene                       | 9 mL CNF<br>18 mL<br>FeCo@rGO |                            |                               |                           |                   |
| 20 wt%-4L                           | 1.5mL CNF<br>6 mL<br>MXene                      | 9 mL CNF<br>6 mL<br>FeCo@rGO  | 4.5mL CNF<br>3 mL<br>MXene | 3 mL CNF<br>12 mL<br>FeCo@rGO |                           |                   |
| 20 wt%-6L<br>(CNF/MXene/FeCo@rGO-G) | 5 mL<br>MXene                                   | 8 mL CNF<br>2 mL<br>FeCo@rGO  | 2 mL CNF<br>3 mL<br>MXene  | 4 mL CNF<br>6 mL<br>FeCo@rGO  | 4 mL CNF<br>1 mL<br>MXene | 10 mL<br>FeCo@rGO |

|                                  |               |                              |                           |                              |                           |                              |
|----------------------------------|---------------|------------------------------|---------------------------|------------------------------|---------------------------|------------------------------|
| CNF/<br>MXene                    | 5 mL<br>MXene | 10 mL CNF                    | 2 mL CNF<br>3 mL<br>MXene | 10 mL CNF                    | 4 mL CNF<br>1 mL<br>MXene | 10 mL CNF                    |
| CNF/<br>MXene/<br>FeCo@rG<br>O-H | 5 mL<br>MXene | 4 mL CNF<br>6 mL<br>FeCo@rGO | 2 mL CNF<br>3 mL<br>MXene | 4 mL CNF<br>6 mL<br>FeCo@rGO | 4 mL CNF<br>1 mL<br>MXene | 4 mL CNF<br>6 mL<br>FeCo@rGO |

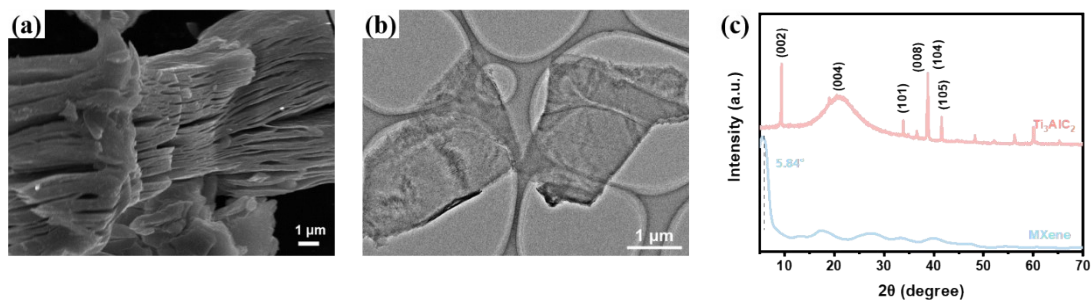

**Fig. S1** (a) SEM image and (b) TEM image of d-MXene; (c) XRD of  $Ti_3AlC_2$  and  $Ti_3C_2T_x$

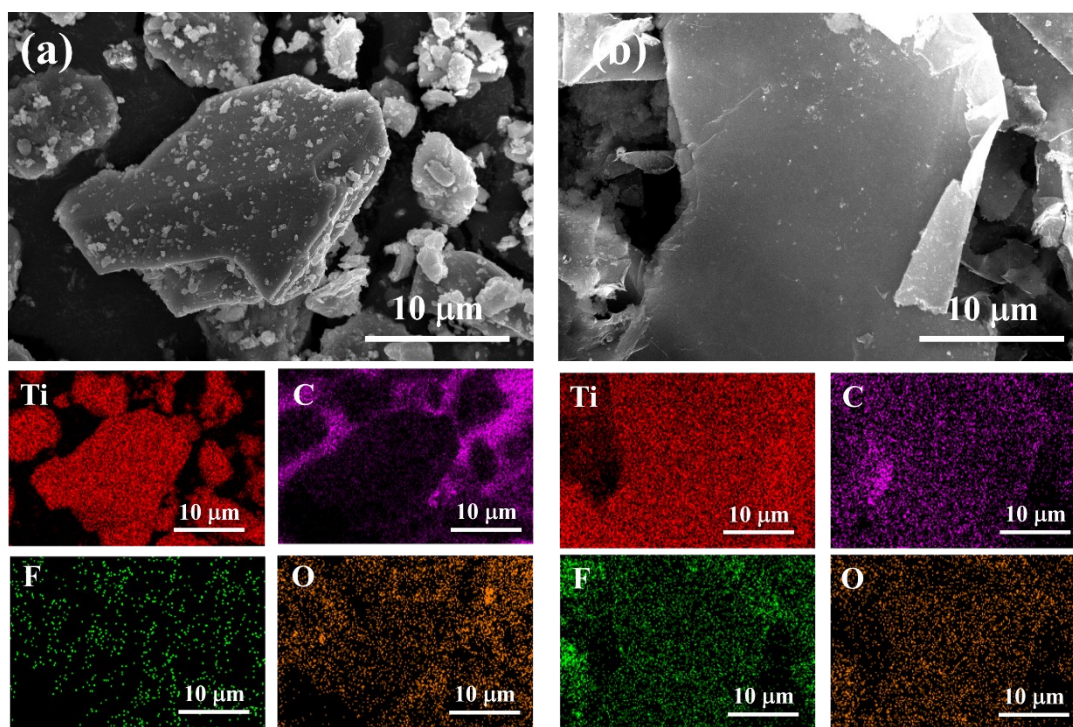

**Fig. S2** SEM images of fracture surface of (a)  $Ti_3AlC_2$  (b)  $Ti_3C_2T_x$  MXene and corresponding EDS mappings of Ti, C, F and O elements

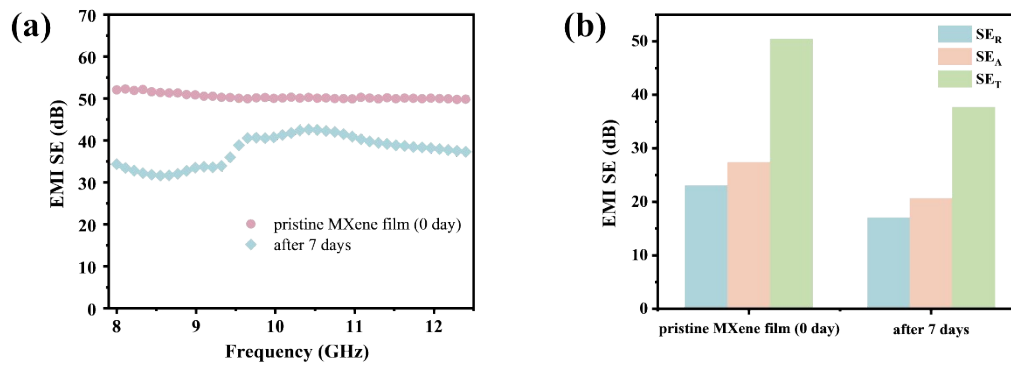

**Fig. S3** (a) EMI SE (b) SE<sub>R</sub>, SE<sub>A</sub> and SE<sub>T</sub> of pristine MXene film and after 7 days

**Table S2** Comparison of properties of CNF/MXene/FeCo@rGO asymmetric gradient alternating multilayered composite membranes with those reported in the literature

| Samples                      | Filler         | thickness (mm) | EMI SE (dB) | R    |
|------------------------------|----------------|----------------|-------------|------|
| MXene/CNF <sup>1</sup>       | MXene          | 0.035          | 39.6        | 0.96 |
| CNT/PP <sup>2</sup>          | CNT            | 2.0            | 32.0        | 0.75 |
| Graphene/CNF <sup>3</sup>    | Graphene       | 0.04           | 34.9        | 0.9  |
| MXene/PVDF <sup>4</sup>      | MXene          | 0.017          | 42.9        | 0.9  |
| GNP-Ni-CNT/PVDF <sup>5</sup> | GNP-Ni-CNT     | 0.6            | 46.0        | 0.8  |
| MXene/EP <sup>6</sup>        | MXene          | 2.0            | 41.0        | 0.75 |
| This Work                    | FeCo@rGO&MXene | 0.192          | 45.20       | 0.71 |

## References

- 1 B. Zhou, Z. Zhang, Y. Li, G. Han, Y. Feng, B. Wang, D. Zhang, J. Ma and C. Liu, *ACS Appl Mater Interfaces*, 2020, **12**, 4895-4905.
- 2 Y.-P. Zhang, C.-G. Zhou, W.-J. Sun, T. Wang, L.-C. Jia, D.-X. Yan and Z.-M. Li, *Composites Science and Technology*, 2020, **197**.
- 3 L. Li, Z. Ma, P. Xu, B. Zhou, Q. Li, J. Ma, C. He, Y. Feng and C. Liu, *Composites Part A: Applied Science and Manufacturing*, 2020, **139**.
- 4 Y. Li, B. Zhou, Y. Shen, C. He, B. Wang, C. Liu, Y. Feng and C. Shen, *Composites Part B: Engineering*, 2021, **217**.
- 5 Q. Qi, L. Ma, B. Zhao, S. Wang, X. Liu, Y. Lei and C. B. Park, *ACS Appl Mater Interfaces*, 2020, **12**, 36568-36577.

- 6 L. Wang, L. Chen, P. Song, C. Liang, Y. Lu, H. Qiu, Y. Zhang, J. Kong and J. Gu,  
*Composites Part B: Engineering*, 2019, **171**, 111-118.
